# Supplementary material
Source: MDPI journal article supplement (https://www.mdpi.com/2073-4441/15/23/4086)
Supplement: s1 [file s1 › water-2715607-supplementary.pdf]

**Table S1.** Organic matter content in mine water.

| Organic matter       | Content              | Unit |
|----------------------|----------------------|------|
| COD <sub>Mn</sub>    | 15.6                 | mg/L |
| Formaldehyde         | 0.05                 | mg/L |
| Trichloromethane     | $3 \times 10^{-5}$   | mg/L |
| Carbon tetrachloride | $2.1 \times 10^{-4}$ | mg/L |
| Organochlorine       | $1.4 \times 10^{-4}$ | mg/L |
| Organic phosphorus   | $1.4 \times 10^{-3}$ | mg/L |
| Volatile phenol      | 0.002                | mg/L |

**Table S2.** The content of TDS, chlorides, sulphates and Cr<sup>6+</sup> in the initial emulsion.

|                 | TDS | Shlorides | Sulphates | Cr <sup>6+</sup> |
|-----------------|-----|-----------|-----------|------------------|
| Content (mg/mL) | 181 | 1.08      | 1.29      | 0.078            |

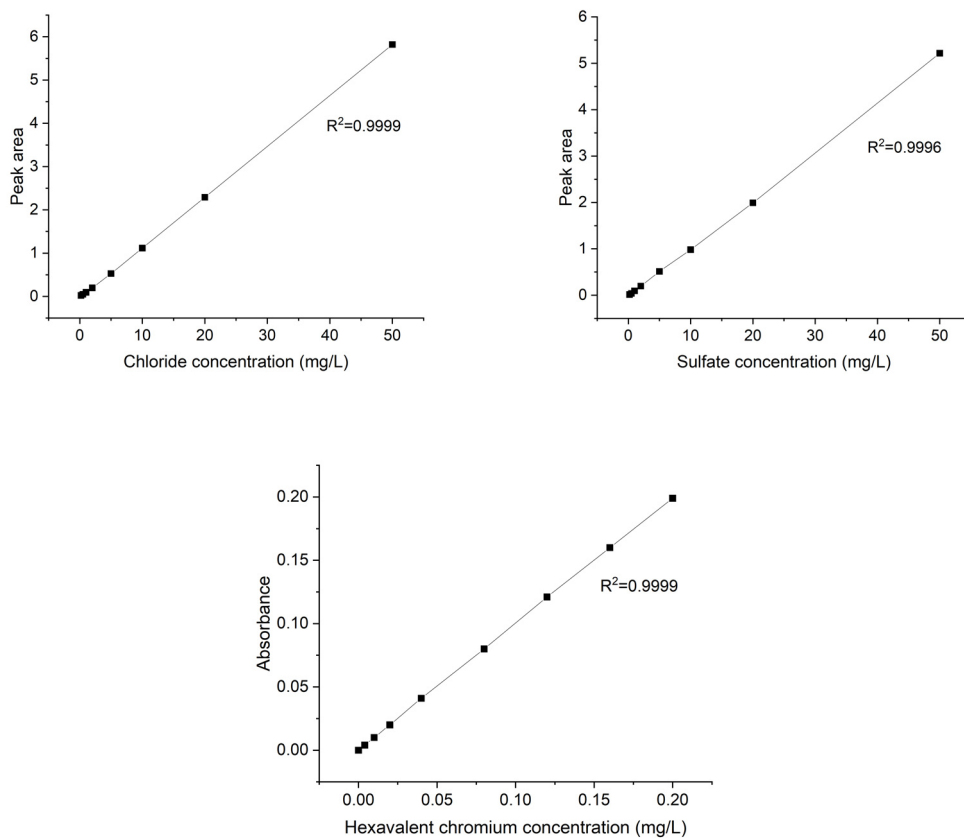**Figure S1.** The standard curves with correlation coefficients for Chloride, Sulfate, and hexavalent chromium (Cr<sup>6+</sup>).
